# Supplementary material
Source: publisher site journal article supplement (https://www.dovepress.com/article/561692)
Supplement: Supplementary file 1 [file 561692%20Supplementary%20File.docx]

**Supplementary File**

**Supplementary Table S1: Pairwise group comparisons using Tukey’s test**

| Parameter | Comparison | Mean difference | 95% CI | Adjusted *P* |
| --- | --- | --- | --- | --- |
| BDNF | Control vs. DM | 76.73 | −6.58 to 160.00 | 0.080 |
| Control vs. DM + Empa | 69.03 | −12.17 to 150.20 | 0.119 |
| Control vs. Empa | 45.87 | −35.33 to 127.10 | 0.434 |
| DM vs. DM + Empa | −7.70 | −88.90 to 73.49 | 0.994 |
| DM vs. Empa | −30.86 | −112.10 to 50.33 | 0.735 |
| DM + Empa vs. Empa | −23.16 | −102.20 to 55.87 | 0.858 |
| Catalase | Control vs. DM | −0.82 | −2.54 to 0.90 | 0.576 |
| Control vs. DM + Empa | −1.40 | −3.12 to 0.32 | 0.144 |
| Control vs. Empa | −0.39 | −2.11 to 1.33 | 0.927 |
| DM vs. DM + Empa | −0.58 | −2.30 to 1.14 | 0.801 |
| DM vs. Empa | 0.43 | −1.29 to 2.15 | 0.907 |
| DM + Empa vs. Empa | 1.01 | −0.71 to 2.73 | 0.402 |
| SOD | Control vs. DM | 1.12 | −1.94 to 4.17 | 0.758 |
| Control vs. DM + Empa | −0.01 | −2.98 to 2.96 | >0.999 |
| Control vs. Empa | 0.62 | −2.35 to 3.59 | 0.942 |
| DM vs. DM + Empa | −1.12 | −4.18 to 1.93 | 0.755 |
| DM vs. Empa | −0.50 | −3.55 to 2.56 | 0.971 |
| DM + Empa vs. Empa | 0.63 | −2.34 to 3.60 | 0.941 |
| GPX | Control vs. DM | 0.06 | −0.01 to 0.13 | 0.106 |
| Control vs. DM + Empa | 0.04 | −0.03 to 0.11 | 0.440 |
| Control vs. Empa | 0.02 | −0.06 to 0.09 | 0.937 |
| DM vs. DM + Empa | −0.02 | −0.09 to 0.05 | 0.838 |
| DM vs. Empa | −0.05 | −0.12 to 0.02 | 0.306 |
| DM + Empa vs. Empa | −0.02 | −0.10 to 0.05 | 0.788 |
| TBARS | Control vs. DM | 2.62 | −0.28 to 5.52 | 0.089 |
| Control vs. DM + Empa | 1.23 | −1.67 to 4.13 | 0.666 |
| Control vs. Empa | 1.56 | −1.34 to 4.46 | 0.480 |
| DM vs. DM + Empa | −1.39 | −4.29 to 1.51 | 0.576 |
| DM vs. Empa | −1.06 | −3.96 to 1.84 | 0.758 |
| DM + Empa vs. Empa | 0.33 | −2.58 to 3.23 | 0.990 |
| NF-κB | Control vs. DM | 0.00 | −0.01 to 0.01 | 0.999 |
| Control vs. DM + Empa | −0.01 | −0.02 to 0.00 | 0.159 |
| Control vs. Empa | −0.00 | −0.01 to 0.01 | 0.927 |
| DM vs. DM + Empa | −0.01 | −0.02 to 0.00 | 0.110 |
| DM vs. Empa | −0.00 | −0.01 to 0.01 | 0.876 |
| DM + Empa vs. Empa | 0.00 | −0.00 to 0.01 | 0.433 |
| Protein level | Control vs. DM | −0.21 | −1.70 to 1.28 | 0.981 |
| Control vs. DM + Empa | 0.05 | −1.44 to 1.53 | 1.000 |
| Control vs. Empa | −0.36 | −1.85 to 1.12 | 0.911 |
| DM vs. DM + Empa | 0.26 | −1.23 to 1.75 | 0.965 |
| DM vs. Empa | −0.15 | −1.64 to 1.33 | 0.993 |
| DM + Empa vs. Empa | −0.41 | −1.90 to 1.07 | 0.878 |

Tukey’s multiple comparisons test was performed following one-way ANOVA. No statistically significant pairwise differences were observed (*P* > 0.05 for all comparisons).
